# Supplementary material for: An ultralight and thermally conductive Ti3C2TxMXene–silver nanowire cellular composite film for high-performance electromagnetic interference shielding
Source: Royal Society of Chemistry journal article supplement (doi:10.1039/d2tc02856e), 2022-01-01
Supplement: d2tc02856e1.pdf [file d2tc02856e1.pdf]

## Supporting Information

### **Ultralight and Thermally Conductive $\text{Ti}_3\text{C}_2\text{T}_x$ MXene-Silver Nanowires Cellular Composite Film for High-Performance Electromagnetic Interference Shielding**

Zhenping Ma<sup>a</sup>, Hui Feng<sup>a</sup>, Yongbao Feng<sup>a\*</sup>, Xin Ding<sup>b</sup>, Xianzhen Wang<sup>a</sup>, Wei Wang<sup>a</sup>, Xiaojie Zhang<sup>a</sup>, Shuo Kong<sup>a</sup>, Xiong Lan<sup>a</sup>, Qiulong Li<sup>a\*</sup>

a. College of Materials Science and Engineering, Nanjing Tech University, Nanjing 211816, China

b. Key Laboratory of Photovoltaic and Energy Conservation Materials, Institute of Solid State Physics, HFIPS, Chinese Academy of Sciences, Hefei 230031, People's Republic of China

[\*] Email: fengyongbao@163.com (Y. B. Feng)

Email: qlli@njtech.edu.cn (Q. L. Li)

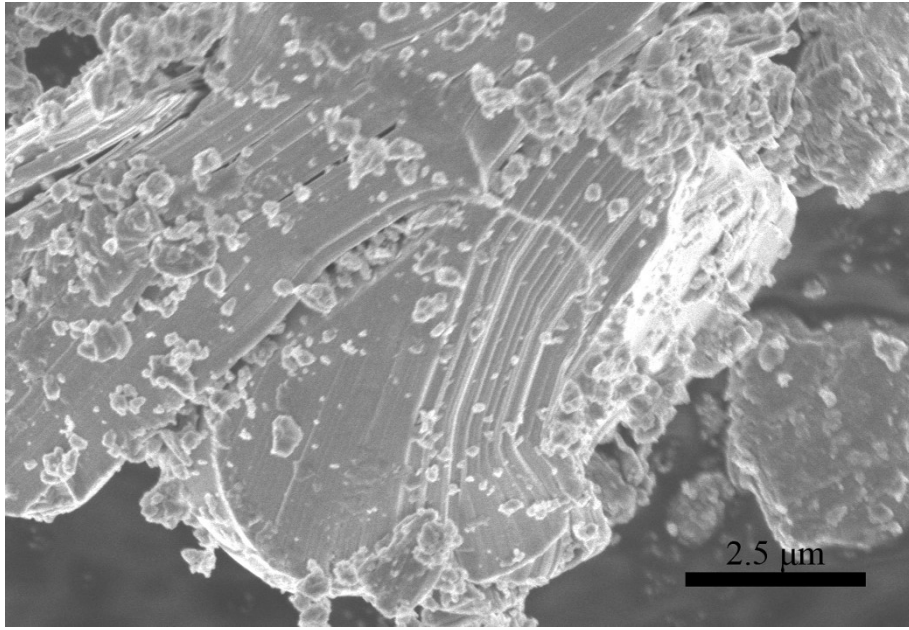

**Figure S1.** SEM image of Ti<sub>3</sub>AlC<sub>2</sub> MAX.

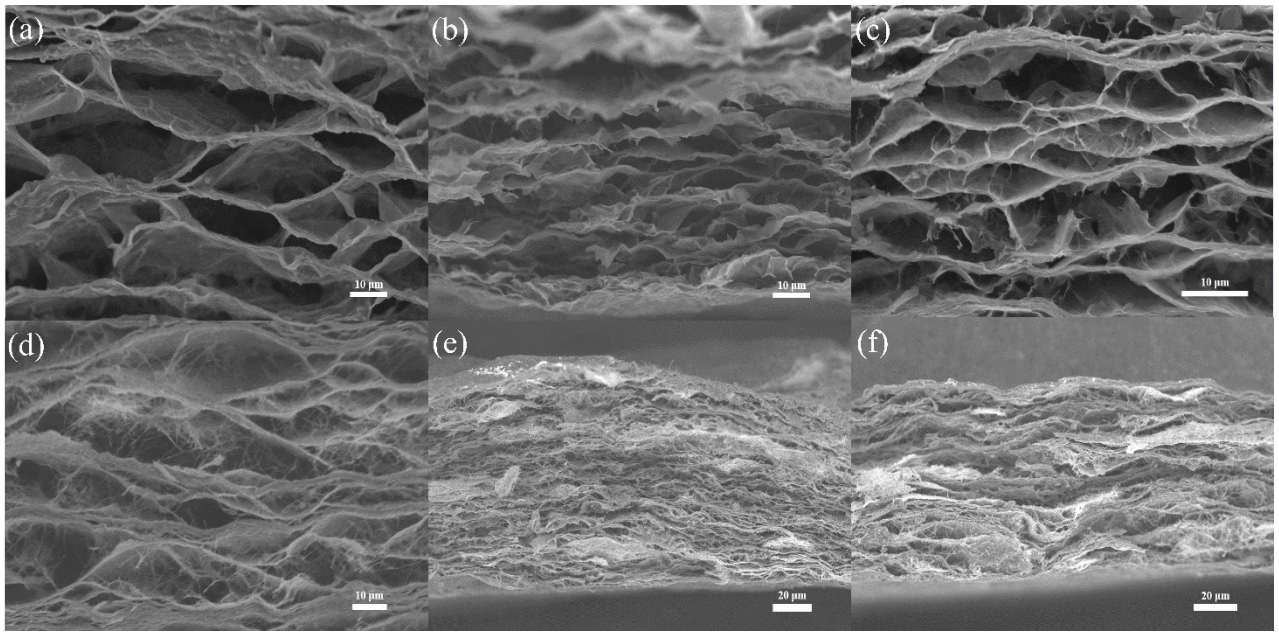

**Figure S2.** Cross-sectional SEM images of (a) PM, (b) MA<sub>0.2</sub>, (c) MA<sub>0.25</sub>, (d) MA<sub>0.5</sub>, (e) MA<sub>0.75</sub> and (f) MA<sub>0.8</sub>.

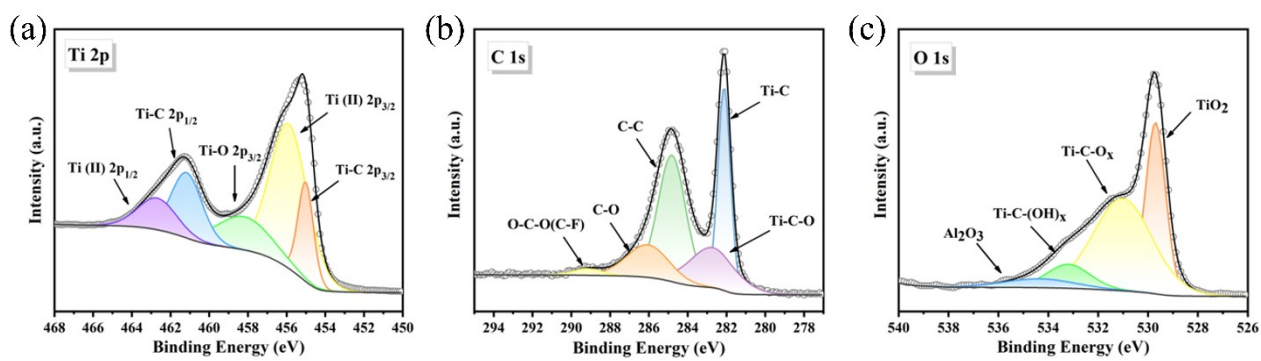

**Figure S3.** High-resolution Ti 2p, C 1s and O 1s spectrum of Ti<sub>3</sub>C<sub>2</sub>T<sub>x</sub> MXene.

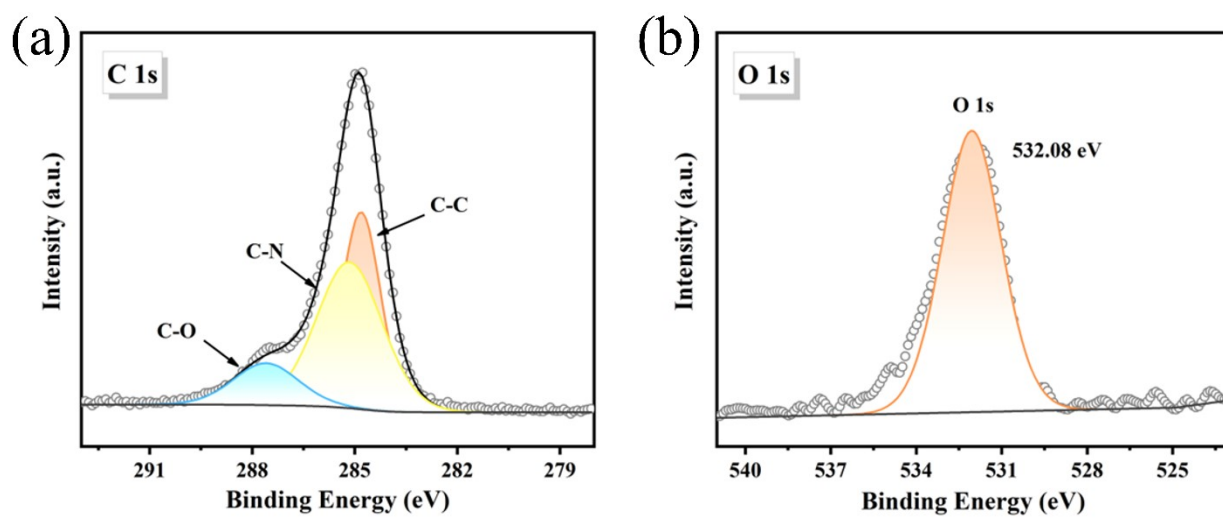

**Figure S4.** High-resolution C 1s and O 1s spectrum of Ag NWs.

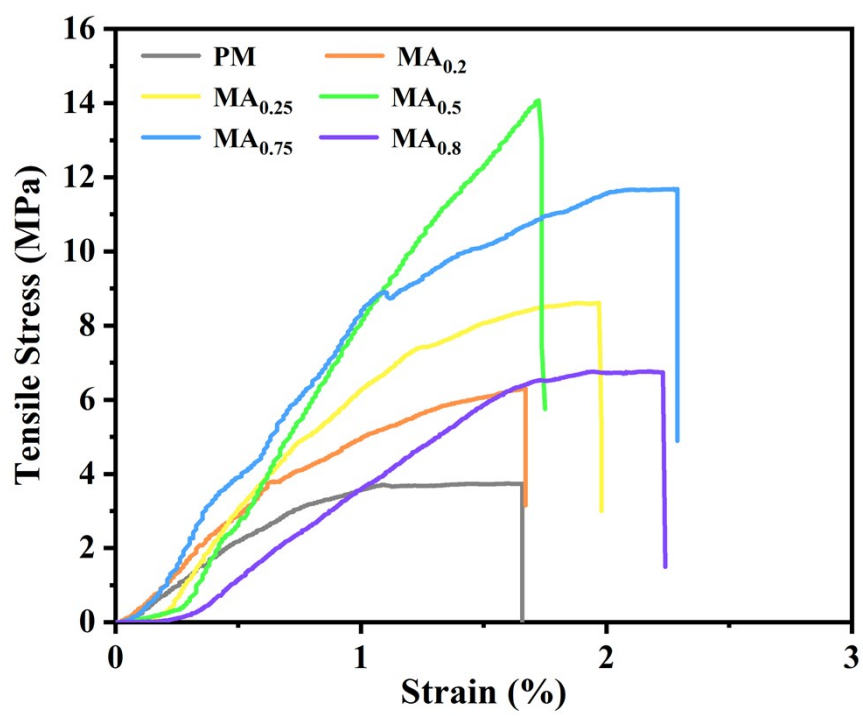

**Figure S5.** The mechanical properties of the composite films.

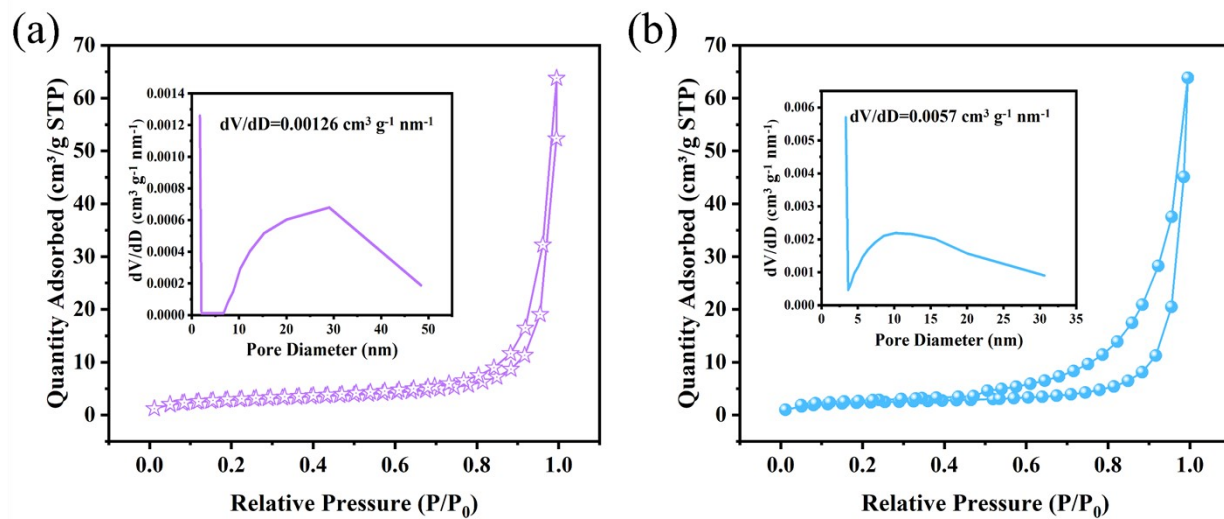

**Figure S6.**  $N_2$  adsorption and desorption isotherms and pore size distribution of (a)  $MA_{0.5}$  and (b)

$MA_{0.8}$ .

**Table S1.** Comparison of electromagnetic interference shielding performance for typical materials.

| Materials                                                  | Thickness (mm) | EMI SE (dB) | SSE/t (dB cm <sup>2</sup> g <sup>-1</sup> ) | Refs.     |
|------------------------------------------------------------|----------------|-------------|---------------------------------------------|-----------|
| CMF/rGO/Ag                                                 | 5              | 63.6        | 7617                                        | 1         |
| PVDF/Ni                                                    | 2              | 26.8        | 128                                         | 2         |
| POM/PLLA/MWCNT                                             | 2              | 48.1        | 177.8                                       | 3         |
| Ti <sub>3</sub> C <sub>2</sub> T <sub>x</sub> /PEDOT : PSS | 0.013          | 21.6        | 9170                                        | 4         |
| d-Ti <sub>3</sub> C <sub>2</sub> T <sub>x</sub> /CNF       | 0.074          | 26          | 2154                                        | 5         |
| Ti <sub>3</sub> C <sub>2</sub> T <sub>x</sub> /ANF         | 0.017          | 20          | 11554                                       | 6         |
| Ti <sub>3</sub> C <sub>2</sub> T <sub>x</sub> /CNTs/CNF    | 0.038          | 38.4        | 7874                                        | 7         |
| Ti <sub>3</sub> C <sub>2</sub> T <sub>x</sub> /SA          | 0.026          | 54.3        | 17586                                       | 8         |
| Ti <sub>3</sub> C <sub>2</sub> T <sub>x</sub> /PVA         | 0.1            | 26          | 4770                                        | 9         |
| Ag/CNTs/PDMS                                               | 1.5            | 56          | 373                                         | 10        |
| AgNW                                                       | 5              | 35          | 2416                                        | 11        |
| AgNW/PVDF                                                  | 0.3            | 23.25       | 989                                         | 12        |
| CNT/Chitosan aerogel                                       | 2.5            | 37.6        | 8556                                        | 13        |
| CNT/PS                                                     | 0.12           | 18.5        | 275                                         | 14        |
| rGO                                                        | 2.5            | 45.1        | 692                                         | 15        |
| rGO/Fe <sub>3</sub> O <sub>4</sub>                         | 0.3            | 24          | 1033                                        | 16        |
| rGO-PEDOT                                                  | 0.8            | 70          | 841                                         | 17        |
| MA <sub>0.5</sub>                                          | 0.101          | 69.36       | 13861                                       | This work |
| MA <sub>0.8</sub>                                          | 0.104          | 81.11       | 16250                                       | This work |

## References

- 1 Y. Shen, Z. Lin, J. Wei, Y. Xu, Y. Wan, T. Zhao, X. Zeng, Y. Hu and R. Sun, *Carbon*, 2022, **186**, 9-18.
- 2 H. M. Zhang, G. C. Zhang, Q. Gao, M. Tang, Z. L. Ma, J. B. Qin, M. Y. Wang and J.-K. Kim, *Chem. Eng. J.*, 2020, **379**, 122304.
- 3 J. Li, J. L. Chen, X. H. Tang, J. H. Cai, J. H. Liu and M. Wang, *J. Colloid Interface Sci.*, 2020, **565**, 536-545.
- 4 R. Liu, M. Miao, Y. Li, J. Zhang, S. Cao and X. Feng, *ACS Appl. Mater. Interfaces*, 2018, **10**, 44787-44795.



- 5 W. T. Cao, F. F. Chen, Y. J. Zhu, Y. G. Zhang, Y. Y. Jiang, M. G. Ma and F. Chen, *ACS Nano*, 2018, **12**, 4583-4593.
- 6 F. Xie, F. Jia, L. Zhuo, Z. Lu, L. Si, J. Huang, M. Zhang and Q. Ma, *Nanoscale*, 2019, **11**, 23382-23391.
- 7 W. Cao, C. Ma, S. Tan, M. Ma, P. Wan and F. Chen, *Nano-Micro Lett.*, 2019, **11**, 72.
- 8 Z. Zhou, J. Liu, X. Zhang, D. Tian, Z. Zhan and C. Lu, *Adv. Mater. Interfaces*, 2019, **6**, 1802040.
- 9 H. Xu, X. Yin, X. Li, M. Li, S. Liang, L. Zhang and L. Cheng, *ACS Appl. Mater. Interfaces*, 2019, **11**, 10198-10207.
- 10 J. Zhang, H. Li, T. Xu, J. Wu, S. Zhou, Z. H. Hang, X. Zhang and Z. Yang, *Carbon*, 2020, **165**, 404-411.
- 11 J. Ma, K. Wang and M. Zhan, *RSC Adv.*, 2015, **5**, 65283-65296.
- 12 H. Cheng, Y. Pan, Q. Chen, R. Che, G. Zheng, C. Liu, C. Shen and X. Liu, *Adv. Compos. Hybrid Mater.*, 2021, **4**, 505-513.
- 13 M. Z. Li, L. C. Jia, X. P. Zhang, D. X. Yan, Q. C. Zhang and Z. M. Li, *J. Colloid Interface Sci.*, 2018, **530**, 113-119.
- 14 Y. Chen, H. B. Zhang, Y. Yang, M. Wang, A. Cao and Z. Z. Yu, *Adv. Funct. Mater.*, 2016, **26**, 447-455.
- 15 D. X. Yan, H. Pang, B. Li, R. Vajtai, L. Xu, P. G. Ren, J. H. Wang and Z. M. Li, *Adv. Funct. Mater.*, 2015, **25**, 559-566.
- 16 W. L. Song, X. T. Guan, L. Z. Fan, W. Q. Cao, C. Y. Wang, Q. L. Zhao and M. S. Cao, *J. Mater. Chem. A*, 2015, **3**, 2097-2107.
- 17 N. Agnihotri, K. Chakrabarti and A. De, *RSC Adv.*, 2015, **5**, 43765-43771.
